# Supplementary material
Source: ML conference proceedings conference paper supplement (https://openaccess.thecvf.com/content/CVPR_2019/html/Avraham_Parallel_Optimal_Transport_CVPR_2019_paper.html)
Supplement: Supplementary file 1 [file Avraham_Parallel_Optimal_Transport_CVPR_2019_supplemental.pdf]

# Parallel Optimal Transport GAN Supplementary Material

Gil Avraham\*      Yan Zuo\*  
Tom Drummond

ARC Centre of Excellence for Robotic Vision, Monash University, Australia

{gil.avraham, yan.zuo, tom.drummond}@monash.edu

## 1. Converting latent vectors into a soft decision forest

**Soft internal decision function** The soft decision function held by each internal decision node in the soft decision forest is defined as:

$$d_n(\mathbf{z}, \Theta) = \sigma(z_n - t_n) \quad (1)$$

$\sigma(z) = (1 + e^{-z})^{-1}$  denotes a sigmoid function and  $\Theta$  represents the parameters of the decision forest.  $z_n$  is the activation value of the latent vector and  $t_n$  is a threshold value for the decision node  $d_n$  which  $z_n$  is compared against. The blending function  $\mu_\ell(\mathbf{z}, \Theta)$  dictates the portions allocated to the values  $q_\ell$  held by each leaf  $\ell$  towards a tree’s final output:

$$\mu_\ell(\mathbf{z}|\Theta) = \prod_{n \in \mathcal{N}} d_n(\mathbf{z}, \Theta)^{1_{\ell \swarrow n}} \bar{d}_n(\mathbf{z}, \Theta)^{1_{\ell \searrow n}} \quad (2)$$

$\bar{d}_n(\mathbf{z}, \Theta)$  is the complement of  $d_n(\mathbf{z}, \Theta)$  (i.e.  $1 - d_n(\mathbf{z}, \Theta)$ ). The indicator function is denoted by  $1_C$  with a condition:

$$1_C = \begin{cases} 1, & \text{if } C = 1 \\ 0, & \text{otherwise} \end{cases} \quad (3)$$

The conditions  $\ell \swarrow n$  and  $\ell \searrow n$  are defined as:

$$\ell \swarrow n = \begin{cases} 1, & \text{if } z_n \leq t_n \\ 0, & \text{otherwise} \end{cases} \quad (4)$$

$$\ell \searrow n = \begin{cases} 1, & \text{if } z_n > t_n \\ 0, & \text{otherwise} \end{cases} \quad (5)$$

The soft decision tree outputs a weighted sum prediction given by:

$$\mathcal{Q}(\mathbf{z}, \Theta) = \sum_{\ell} \mu_\ell(\mathbf{z}|\Theta) q_\ell \quad (6)$$

\* Authors contributed equally

**Soft residual decision forest** For combining the ensemble of soft decision trees, we employ the residual method in [5], and multiplicatively combine distributions to generate the final output. Hence the transformed latent vector,  $z'_g$ , is learned as the product of each individual decision tree’s given output *i.e.*:

$$z'_g = \prod_{t=1}^{\mathcal{T}} \mathcal{Q}^t(\mathcal{D}^t(\mathbf{z}, \Theta^t)) \quad (7)$$

Where  $\mathcal{D}^t$  represents the internal decision node functions in the decision tree  $t$ .

## 2. Ablation Study on the choice of $\mathcal{F}$

Various configurations were evaluated as preliminary tests to verify the effectiveness of optimal transport on a low dimension representation. Here, we show performance in Inception Score and FID Score across various configurations:

- 1) We tested naïve  $L_2$  regularisation by omitting Algorithm 1 and using the  $L_2$  cost between randomly sampled  $z_r, z_g$  (WGAN-GP+ $L_2$ ).
- 2) Using  $c(a, b) = \|a - b\|^2$  as the cost function (POT-GAN ( $L_2$ )).
- 3) Using  $c(a, b) = \|a - \mathcal{F}_\theta(b)\|^2$  as the cost function, where  $\mathcal{F}_\theta$  is a 3-layer Multi-Layer Perceptron (MLP) parameterised by  $\theta$  (POT-GAN (MLP)).

| Inception Score (CIFAR-10) |                      |                  |                  |
|----------------------------|----------------------|------------------|------------------|
| WGAN-GP<br>+ $L_2$         | POT-GAN<br>( $L_2$ ) | POT-GAN<br>(MLP) | POT-GAN<br>(LTF) |
| 5.92±0.08                  | 6.62±0.05            | 6.72±0.05        | <b>6.87±0.04</b> |
| FID Score (CIFAR-10)       |                      |                  |                  |
| 65.3                       | 34.1                 | 33.5             | <b>32.5</b>      |

## 3. Critic Loss Curves

Fig. 1 shows the critic loss curves for POT-GAN and WGAN-GP over 100k training iterations on the CIFAR-10

dataset. These loss curves correlate well with the improved convergence rates of our proposed method.

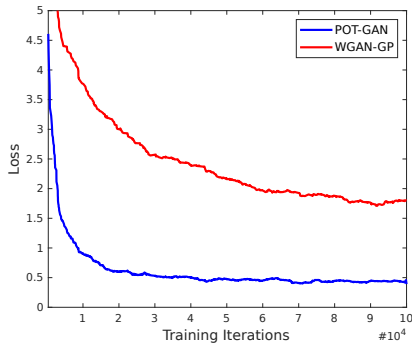

Figure 1: Critic loss curves over a 100k training iterations for POT-GAN and WGAN-GP on CIFAR-10

#### 4. Architectures

**GAN architecture** Our GAN architecture is similar to generator and discriminator networks in [3]. The generator network is composed of 2-strided  $5 \times 5$  deconvolution layers with batch normalisation and ReLU activation. The critic network consists of 2-strided  $5 \times 5$  convolution layers with Leaky ReLU activation. Layer normalisation [1] is used as a drop-in replacement for batch normalisation in the critic network following the recommendation of [2]. Upsampling and downsampling is achieved via these strided deconvolution and convolution layers respectively.

**VAE architecture** Our VAE architecture is based off the architecture in [3]. The decoder network is made of 2-strided  $5 \times 5$  deconvolution layers with batch normalisation and ReLU activation. The encoder network consists of 2-strided  $5 \times 5$  convolution layers with batch normalisation and ReLU activation. Upsampling and downsampling is achieved via these strided deconvolution and convolution layers respectively.

**Soft decision forest architecture** Our soft decision forest is composed of 8 soft decision trees, each of 6-depth. Each decision tree contains  $2^6 - 1 = 63$  internal decision nodes and  $2^6 = 64$  leaf nodes. Hence, in total the soft decision forest contains  $8 \times 63 = 504$  decision nodes and  $8 \times 64 = 512$  leaf nodes. The latent vector  $z_g$  is first upsampled from 128 dimensions to 504 dimensions to match the required number of decision nodes using a fully connected linear layer. Each decision node is assigned one threshold value, and each leaf node is assigned a 128 vector to match the output transformed vector  $z'_g$ .

| <b>Generator <math>G(z)</math></b> |              |            |            |            |                           |
|------------------------------------|--------------|------------|------------|------------|---------------------------|
|                                    | Kernel Size  | Batch Norm | Activation | Resample   | Output Shape              |
| $z$                                | -            | No         | -          | -          | 128                       |
| Linear + Reshape                   | -            | Yes        | ReLU       | -          | $512 \times 4 \times 4$   |
| Deconv                             | $5 \times 5$ | Yes        | ReLU       | $\uparrow$ | $512 \times 8 \times 8$   |
| Deconv                             | $5 \times 5$ | Yes        | ReLU       | $\uparrow$ | $256 \times 16 \times 16$ |
| Deconv                             | $5 \times 5$ | Yes        | ReLU       | $\uparrow$ | $128 \times 32 \times 32$ |
| Deconv + Tanh                      | $5 \times 5$ | Yes        | -          | $\uparrow$ | $3 \times 64 \times 64$   |

Table 1: Generator network architecture.  $\uparrow$  represents upsampling via strided deconvolution

| <b>Critic <math>D(x)</math></b> |              |            |            |              |                           |
|---------------------------------|--------------|------------|------------|--------------|---------------------------|
|                                 | Kernel Size  | Batch Norm | Activation | Resample     | Output Shape              |
| Conv                            | $5 \times 5$ | No         | Leaky ReLU | $\downarrow$ | $64 \times 32 \times 32$  |
| Conv                            | $5 \times 5$ | No         | Leaky ReLU | $\downarrow$ | $128 \times 16 \times 16$ |
| Conv                            | $5 \times 5$ | No         | Leaky ReLU | $\downarrow$ | $256 \times 8 \times 8$   |
| Conv                            | $5 \times 5$ | No         | Leaky ReLU | $\downarrow$ | $512 \times 4 \times 4$   |
| Reshape + Linear                | -            | No         | -          | -            | 1                         |

Table 2: Critic network architecture.  $\downarrow$  represents downsampling via strided convolution

| <b>Decoder <math>Dec(z)</math></b> |              |            |            |            |                           |
|------------------------------------|--------------|------------|------------|------------|---------------------------|
|                                    | Kernel Size  | Batch Norm | Activation | Resample   | Output Shape              |
| $z$                                | -            | -          | 128        | -          | -                         |
| Linear + Reshape                   | -            | No         | ReLU       | -          | $512 \times 4 \times 4$   |
| Deconv                             | $5 \times 5$ | Yes        | ReLU       | $\uparrow$ | $256 \times 8 \times 8$   |
| Deconv                             | $5 \times 5$ | Yes        | ReLU       | $\uparrow$ | $128 \times 16 \times 16$ |
| Deconv                             | $5 \times 5$ | Yes        | ReLU       | $\uparrow$ | $64 \times 32 \times 32$  |
| Deconv + Tanh                      | $5 \times 5$ | Yes        | -          | $\uparrow$ | $3 \times 64 \times 64$   |

Table 3: Decoder network architecture.  $\uparrow$  represents upsampling via strided deconvolution

| <b>Encoder <math>Enc(x)</math></b> |              |            |            |              |                           |
|------------------------------------|--------------|------------|------------|--------------|---------------------------|
|                                    | Kernel Size  | Batch Norm | Activation | Resample     | Output Shape              |
| Conv                               | $5 \times 5$ | Yes        | ReLU       | $\downarrow$ | $64 \times 32 \times 32$  |
| Conv                               | $5 \times 5$ | Yes        | ReLU       | $\downarrow$ | $128 \times 16 \times 16$ |
| Conv                               | $5 \times 5$ | Yes        | ReLU       | $\downarrow$ | $256 \times 8 \times 8$   |
| Conv                               | $5 \times 5$ | Yes        | ReLU       | $\downarrow$ | $512 \times 4 \times 4$   |
| Reshape + Linear                   | -            | No         | -          | -            | 128                       |

Table 4: Encoder network architecture.  $\downarrow$  represents downsampling via strided convolution

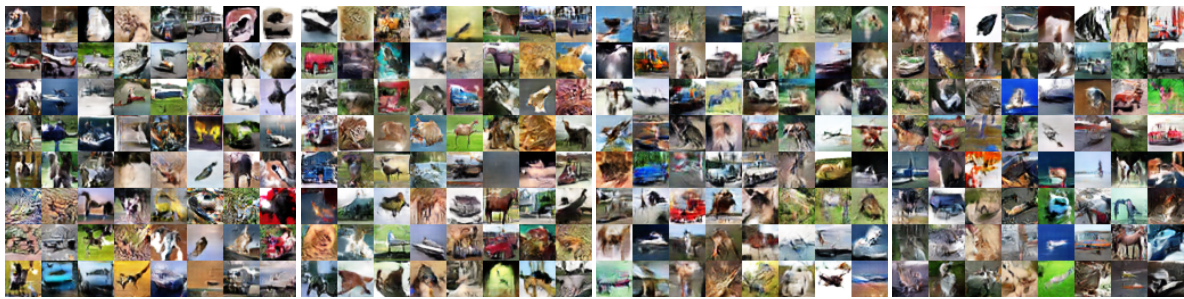

(a) DCGAN [3]

(b) VEEGAN [4]

(c) WGAN-GP [2]

(d) POT-GAN (Ours)

Figure 2: Additional qualitative results on the CIFAR-10 dataset.

## References

- [1] J. L. Ba, J. R. Kiros, and G. E. Hinton. Layer normalization. *arXiv preprint arXiv:1607.06450*, 2016. 2
- [2] I. Gulrajani, F. Ahmed, M. Arjovsky, V. Dumoulin, and A. Courville. Improved training of wasserstein gans. *arXiv preprint arXiv:1704.00028*, 2017. 2, 4
- [3] A. Radford, L. Metz, and S. Chintala. Unsupervised representation learning with deep convolutional generative adversarial networks. *arXiv preprint arXiv:1511.06434*, 2015. 2, 4
- [4] A. Srivastava, L. Valkoz, C. Russell, M. U. Gutmann, and C. Sutton. Veegan: Reducing mode collapse in gans using implicit variational learning. In *Advances in Neural Information Processing Systems*, pages 3310–3320, 2017. 4
- [5] Y. Zuo and T. Drummond. Fast residual forests: Rapid ensemble learning for semantic segmentation. In *Conference on Robot Learning*, pages 27–36, 2017. 1
